# Supplementary material for: First reported case in Canada of anaphylaxis to lupine in a child with peanut allergy
Source: Springer Nature journal article supplement (doi:10.1186/s13223-018-0303-4), 2018-10-10
Supplement: MOESM1 [file 16234836]

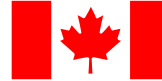

## Notice

This archive of previously issued food recalls and allergy alerts is provided for reference and research purposes.

Users should note that the products listed in the archive have been subject to removal from the marketplace or appropriate corrective action. Food recalls or allergy alerts are not an indication of the food safety status of products produced at a later date.

# Consumer Advisory - Lupin may cause allergic reactions in peanut allergic consumers

**Recall / advisory date:**

May 12, 2017

**Reason for recall / advisory:**

Allergen - Other

**Hazard classification:**

--

**Company / Firm:**

--

**Extent of the distribution:**

Consumer

## Contents

- [Advisory details](#)
- [Affected products](#)
- [More information](#)

- [Media enquiries](#)

## Advisory details

Ottawa, May 12, 2017 - Peanut allergic consumers should be aware that lupin can potentially cause allergic reactions. The Canadian Food Inspection Agency is working with Health Canada on preparing information related to the potential risk of lupin for peanut allergic consumers, which will be shared with the public by Health Canada.

In response to reported reactions from consumers, Loblaw Companies Limited has voluntarily recalled [PC \(President's Choice\) Blue Menu](#) brand Buttermilk Protein Pancake Mix and Apple Cinnamon Flavour Protein Pancake Mix from the marketplace. These products contain lupin pulse flour as an ingredient. While the lupin pulse flour was correctly identified on the label, this ingredient could cause a potential reaction in consumers with peanut allergies.

## Affected products

| Brand Name                                       | Common Name                                | Size         | Code(s) on Product | UPC (Universal Product Code) |
|--------------------------------------------------|--------------------------------------------|--------------|--------------------|------------------------------|
| <a href="#">PC (Presidents Choice) Blue Menu</a> | Buttermilk Protein Pancake Mix             | 340 g (gram) | All codes          | 0 60383 18131 4              |
| <a href="#">PC (Presidents Choice) Blue Menu</a> | Apple Cinnamon Flavour Protein Pancake Mix | 340 g (gram) | All codes          | 0 60383 18132 1              |

### More information

Loblaw Companies Limited: 1-888-495-5111 or <http://www.newswire.ca/news-releases/presidents-choice-recalling-blue-menu-protein-pancake-mixes-due-to-potential-allergen-risk-621909793.html>

For more information, consumers and industry can contact the [CFIA \(Canadian Food Inspection Agency\)](#) by filling out [the online feedback form](#).

## Media enquiries

[CFIA \(Canadian Food Inspection Agency\) Media Relations](#)

613-773-6600

 [Share this page](#)

**Date modified:**

2017-05-12
